# Supplementary material for: Peste des petits ruminants (PPR): A neglected tropical disease in Maghreb region of North Africa and its threat to Europe
Source: PLoS One. 2017 Apr 20;12(4):e0175461. doi: 10.1371/journal.pone.0175461 (PMC5398521; doi:10.1371/journal.pone.0175461)
Supplement: S1 Table — (XLSX) [file pone.0175461.s001.xlsx]

## Sheet: Sheet1
Supplementary Table 1 Full-length PPRV Sequences
Accession	Location	Year
KM463083	Kenya	2011
KJ867543	Uganda	2012
KJ867540	Ethiopia	1994
KJ867545	UAE	1986
KJ867544	Oman	1983
KX354359	China	2015
KX033350	India	2016
KR828813	Nigeria	2013
KT633939	China	2015
KP260624	China	2014
KM089830	China	2014
KM089832	China	2014
KP868655	China	2014
KM089831	China	2014
KM091959	China	2013
KM816619	China	2014
KJ867541	Ethiopia	2010
KC594074	Morocco	2008
NC_006383	Turkey	2000
AJ849636.2	Turkey	2000
KR140086	India	1994
JX217850	Tibet	2008
FJ905304	Tibet	2007
JF939201	Tibet	2007
KT270355	India	2014
KR261605	India	2014
EU267273	Cote_d'Ivoire	1989
KP789375	Senegal	1969
KU236379	Liberia	2015
KR781450	Benin	1969
EU267274	Nigeria	1976
KJ466104	Ghana	2010
KM212177	Senegal	2013
KR781451	Cote_d'Ivoire	2009
KR781449	Benin	2011
KR828814	Nigeria	2012
